# Supplementary material
Source: HighWire-hosted journal article supplement (https://jnm.snmjournals.org/highwire/filestream/93947/field_highwire_adjunct_files/1/49833_Supp_Fig_2.pdf)
Supplement: 49833_Supp_Fig_2.pdf [file 49833_Supp_Fig_2.pdf]

Saturation binding by astatinated and iodinated Herceptin on Her2 expressing SKOV 3 cells

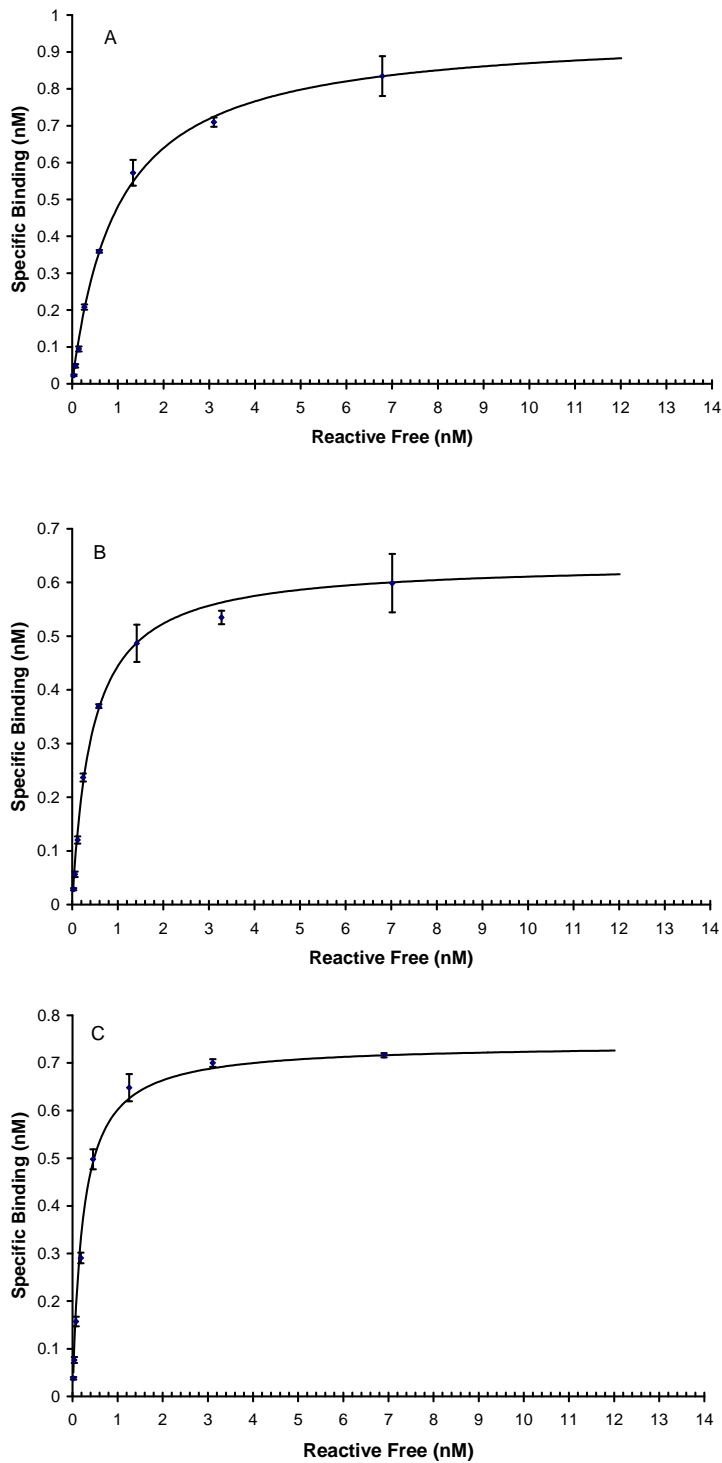

Figure 2. Her2 receptor saturation on SKOV 3 Cells by  $^{211}\text{At}$ -Herceptin, A) direct-astatinated, B) conventionally astatinated, and C)  $^{125}\text{I}$ -Herceptin. Calculated  $K_d$  values were, A)  $1.0 \pm 0.06$  nM, B)  $0.44 \pm 0.06$  nM, and C)  $0.29 \pm 0.02$  nM. The specific activity of the astatinated antibodies were in A) 490 MBq/mg and B) 40 MBq/mg.
